# Supplementary material for: Identification of ACE I-Inhibitory Peptides Released by the Hydrolysis of Tub Gurnard (Chelidonichthys lucerna) Skin Proteins and the Impact of Their In Silico Gastrointestinal Digestion
Source: MDPI journal article supplement (doi:10.3390/md21020131), 2023-02-17
Supplement: s1 [file s1]

**Figure S1.** Elution profiles of PRFs derived from Alcalase (a) and Esperase (b) hydrolysates. The fractions were collected at different elution times (in minutes): a) 6 ( $A_I$ ), 7 ( $A_{II}$ ), 8-12 ( $A_{III}$ ), 19-22 ( $A_{IV}$ ), 23-30 ( $A_V$ ); b) 6-8 ( $E_I$ ), 18-19 ( $E_{II}$ ), 20-22 ( $E_{III}$ ), 23-25 ( $E_{IV}$ ).

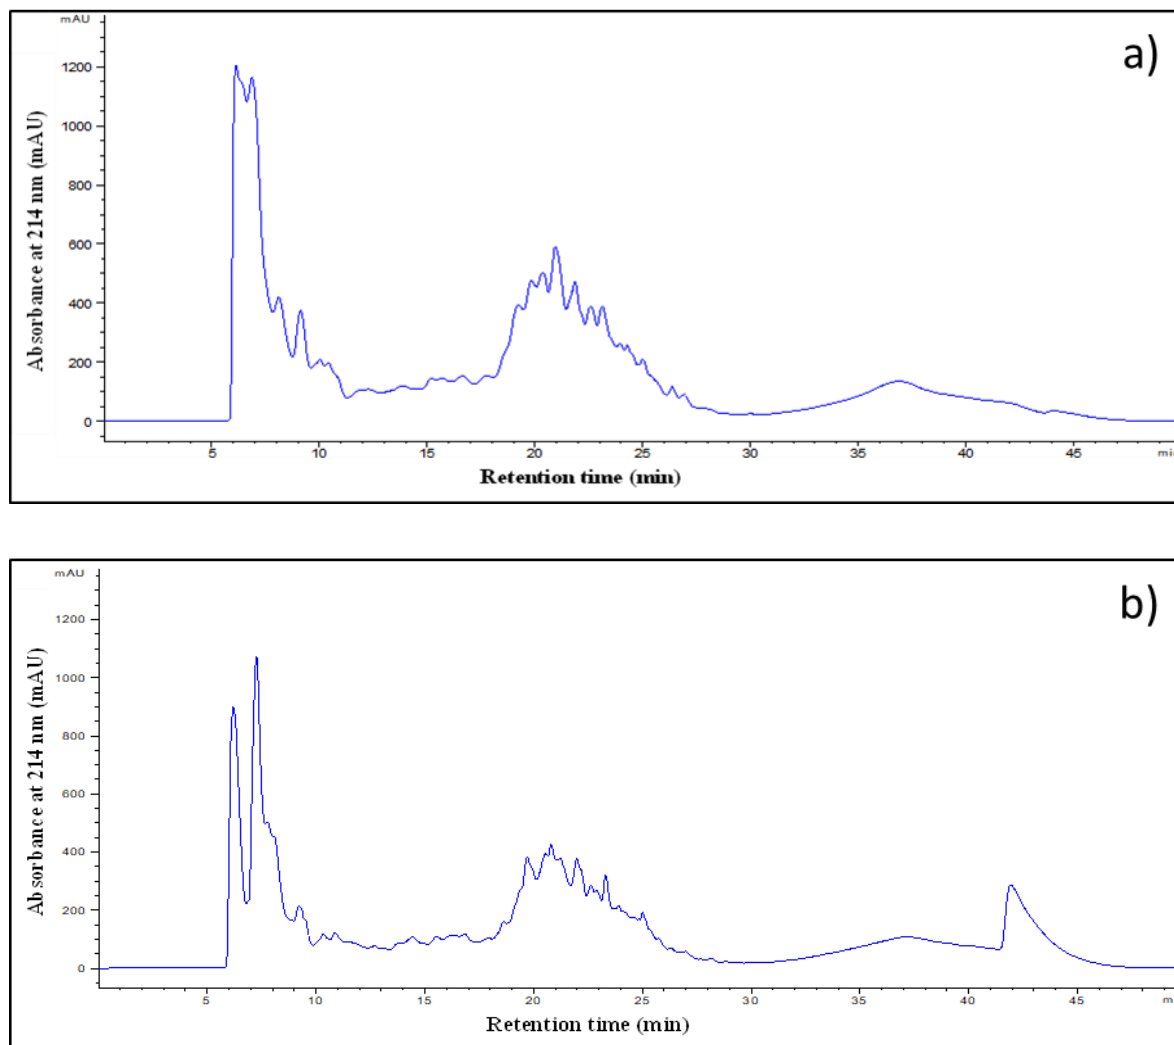

**Figure S2.** Elution profiles of PRFs that showed the most potent ACE-inhibiting activity, at 214 nm (in red) and 280 nm (in green). The fractions were collected at different elution times (in minutes): A<sub>IV</sub>: 9.5-11.5 (A<sub>IV-1</sub>), 11.5-12 (A<sub>IV-2</sub>), 12-14,5 (A<sub>IV-3</sub>); 14.5-15.5 (A<sub>IV-4</sub>), 15.5-17 (A<sub>IV-5</sub>), 17-19,5 (A<sub>IV-6</sub>); A<sub>V</sub>: 15.5-17.5 (A<sub>V-1</sub>), 17.5-19.5 (A<sub>V-2</sub>), 19.5-21.5 (A<sub>V-3</sub>), 21.5-27 (A<sub>V-4</sub>); E<sub>IV</sub>: 12-13 (E<sub>IV-1</sub>), 13-15 (E<sub>IV-2</sub>), 15-16 (E<sub>IV-3</sub>), 16-19 (E<sub>IV-4</sub>), 19-20 (E<sub>IV-5</sub>).

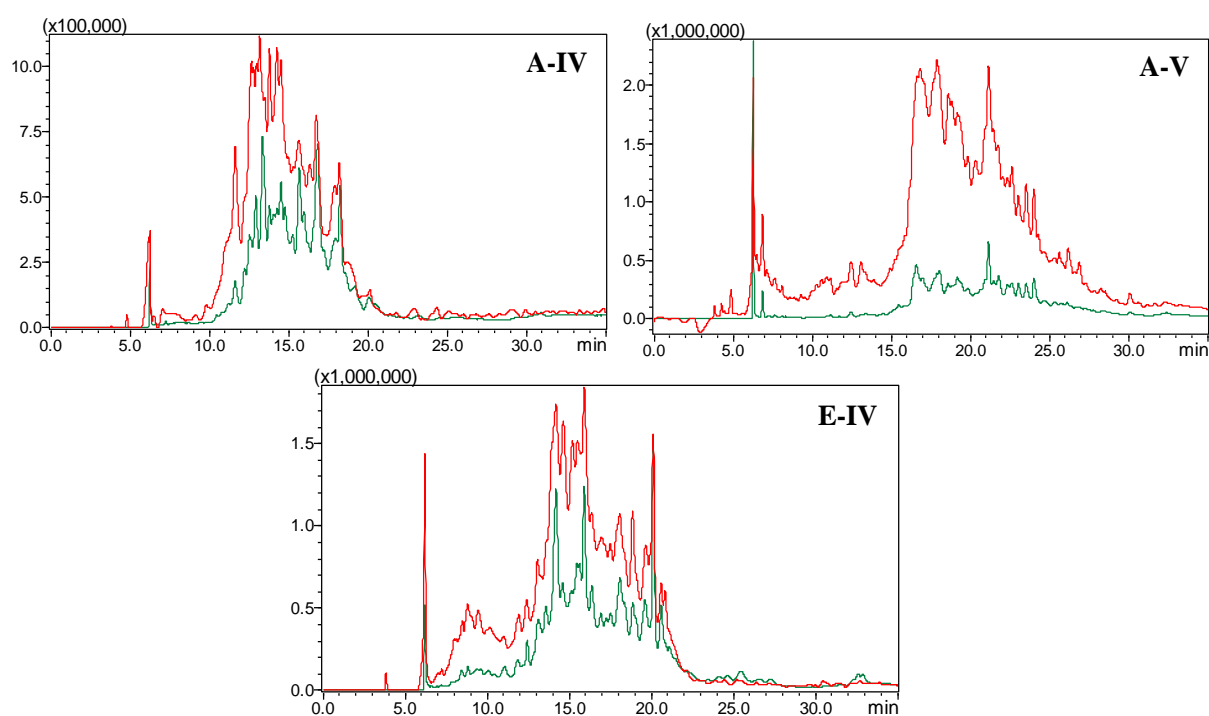

**Table S1:** ACE-inhibitory activity of fractions obtained by chromatography at a final concentration of 0.12 mg/ml (dried weight).

| HPLC Sub-fractions  |                  | ACE inhibition (%) |
|---------------------|------------------|--------------------|
| <b>Esperase-PRF</b> | E <sub>I</sub>   | 86.59±0.48         |
|                     | E <sub>II</sub>  | 85.33±2.01         |
|                     | E <sub>III</sub> | 84.32±0.43         |
|                     | E <sub>IV</sub>  | 93.25±3.06         |
| <b>Alcalase-PRF</b> | A <sub>I</sub>   | 35.93±1.99         |
|                     | A <sub>II</sub>  | 52.69±0.80         |
|                     | A <sub>III</sub> | 70.37±0.78         |
|                     | A <sub>IV</sub>  | 84.25±0.65         |
|                     | A <sub>V</sub>   | 86.06±0.30         |

**Table S2:** ACE-inhibitory activity of sub-fractions obtained by chromatography at a final concentration of 13 µg/ml (dried weight) and IC<sub>50</sub> values of those showing the most potent activity.

| HPLC Sub-fractions    |                    | ACE inhibition (%) | IC <sub>50</sub> value (µg/ml) |
|-----------------------|--------------------|--------------------|--------------------------------|
| <b>E<sub>IV</sub></b> | E <sub>IV</sub> -1 | 23.17±2.37         | 33±3                           |
|                       | E <sub>IV</sub> -2 | No activity        |                                |
|                       | E <sub>IV</sub> -3 | 16.86±0.75         |                                |
|                       | E <sub>IV</sub> -4 | 10.56±3.77         |                                |
|                       | E <sub>IV</sub> -5 | No activity        |                                |
| <b>A<sub>IV</sub></b> | A <sub>IV</sub> -1 | 7.90±3.40          | 29±6                           |
|                       | A <sub>IV</sub> -2 | 38.46±0.23         |                                |
|                       | A <sub>IV</sub> -3 | 6.01±0.85          |                                |
|                       | A <sub>IV</sub> -4 | 14.47±2.56         |                                |
|                       | A <sub>IV</sub> -5 | 44.95±2.35         |                                |
|                       | A <sub>IV</sub> -6 | No activity        |                                |
| <b>A<sub>V</sub></b>  | A <sub>V</sub> -1  | 16.30±0.15         |                                |
|                       | A <sub>V</sub> -2  | 2.86±0.67          |                                |
|                       | A <sub>V</sub> -3  | 11.06±2.34         |                                |
|                       | A <sub>V</sub> -4  | 2.86±0.53          |                                |
